# Supplementary figures and images for: Dynamics of Gut Microbiome and Transcriptome in Korea Native Ricefish (Oryzias latipes) during Chronic Antibiotics Exposure
Source: Preprints.org preprint supplement (doi:10.20944/preprints202206.0389.v1), 2022-06-29

Fig. S1

(A)

GO biological processes

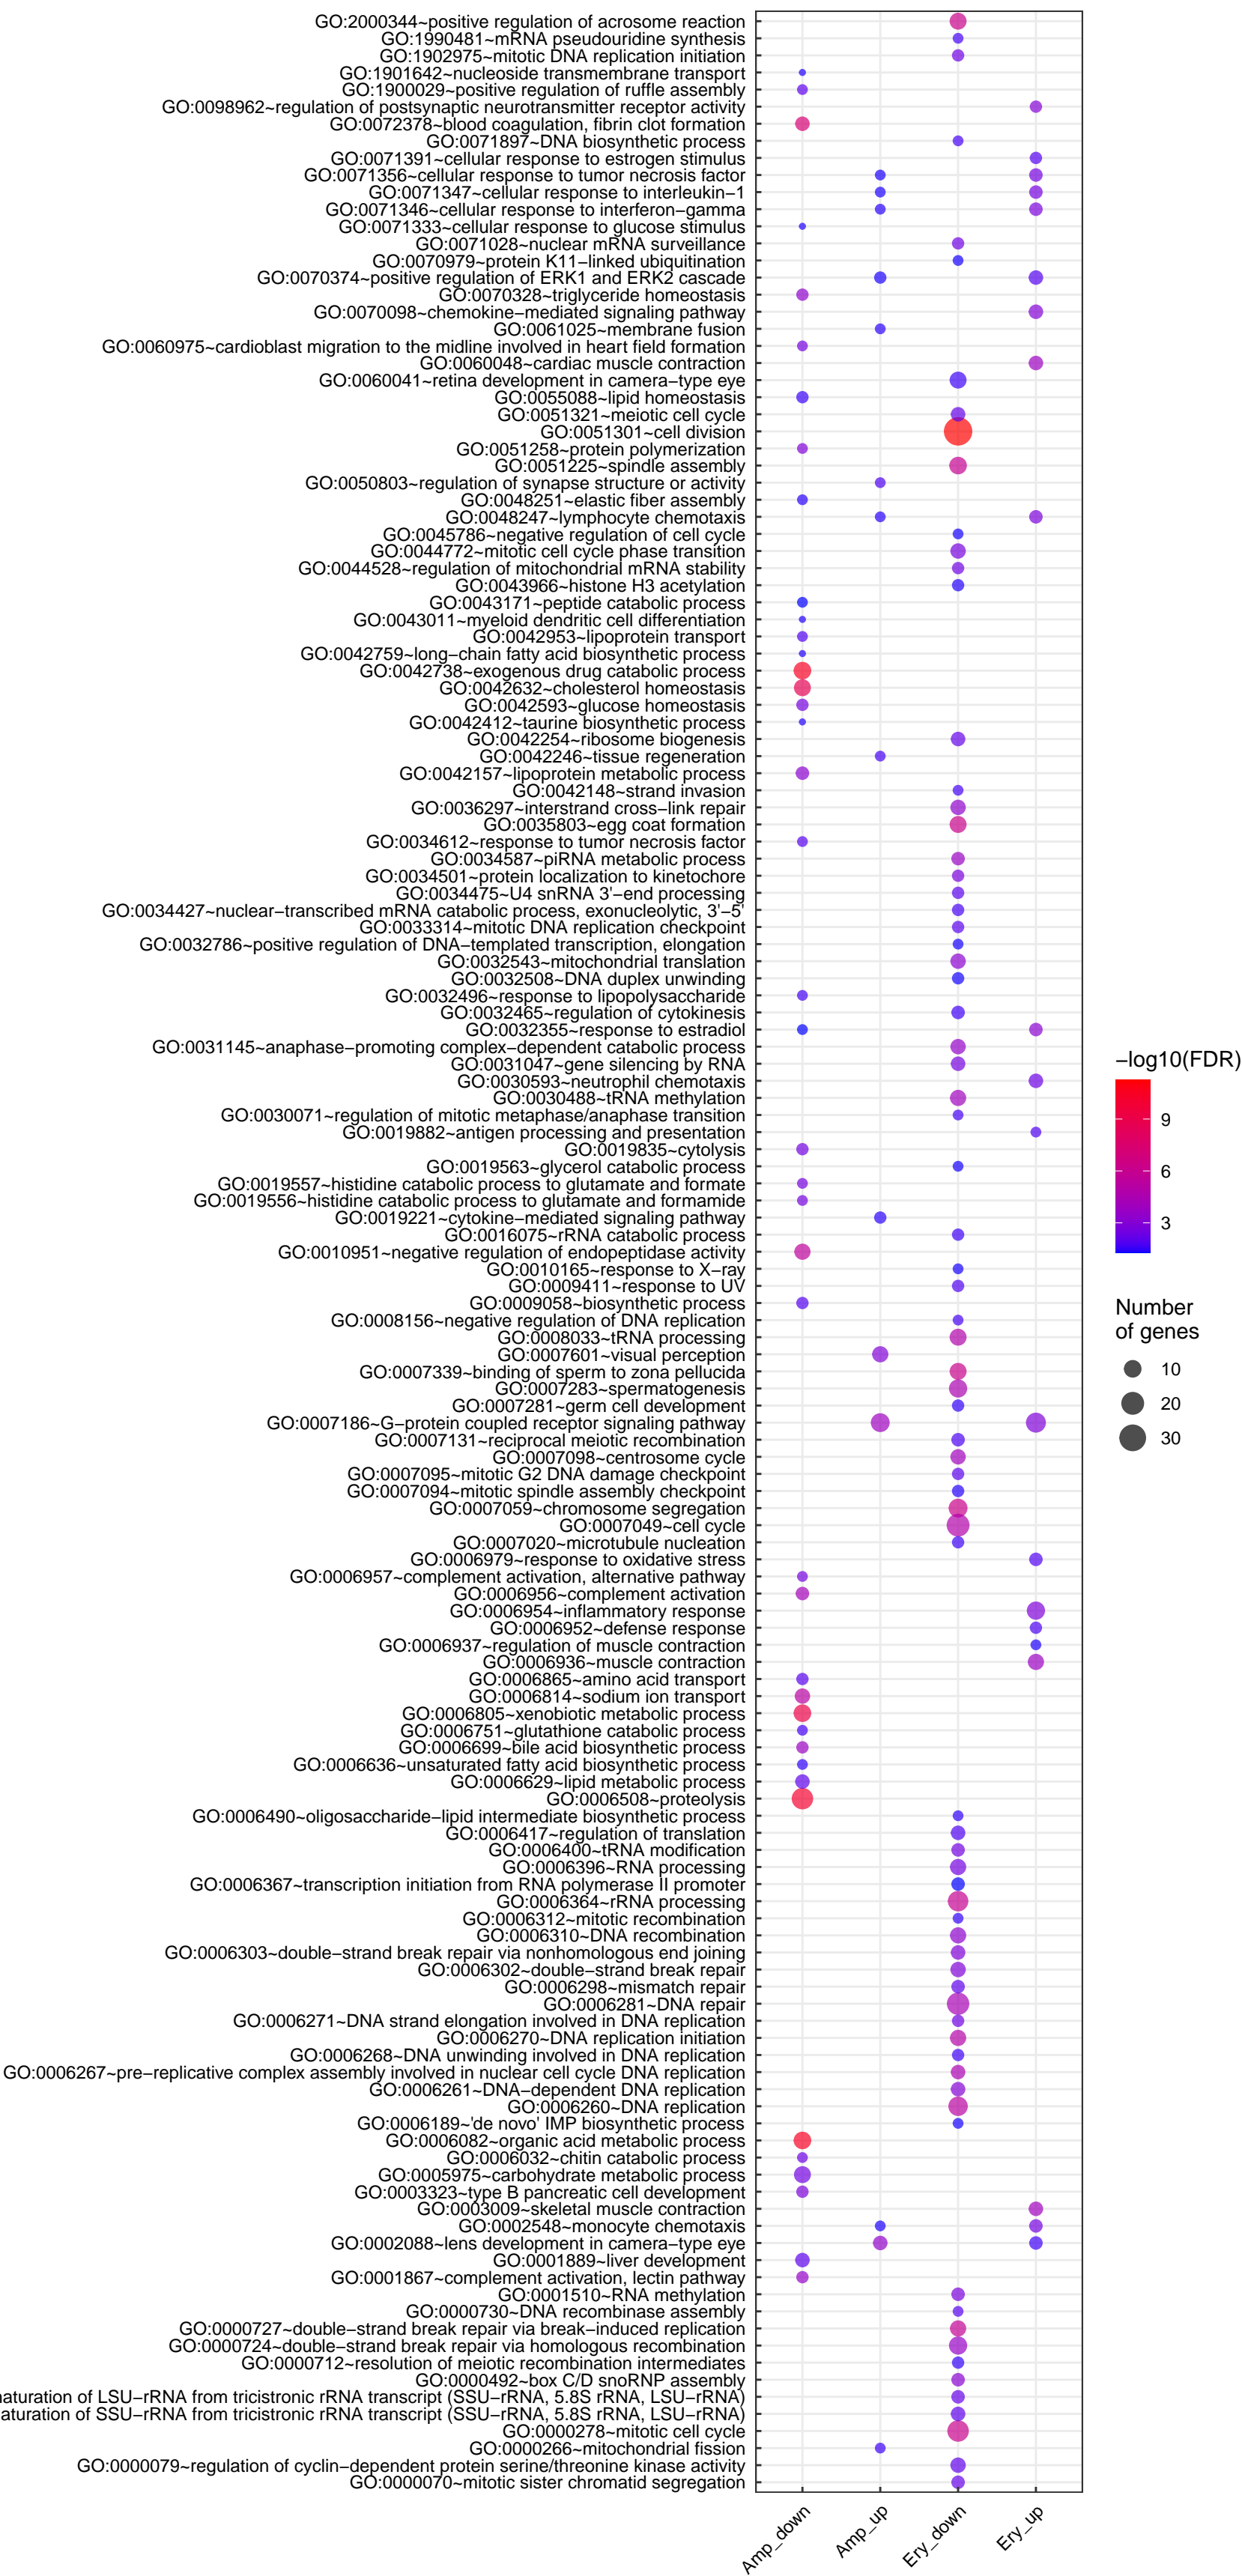

Fig. S1

(B)

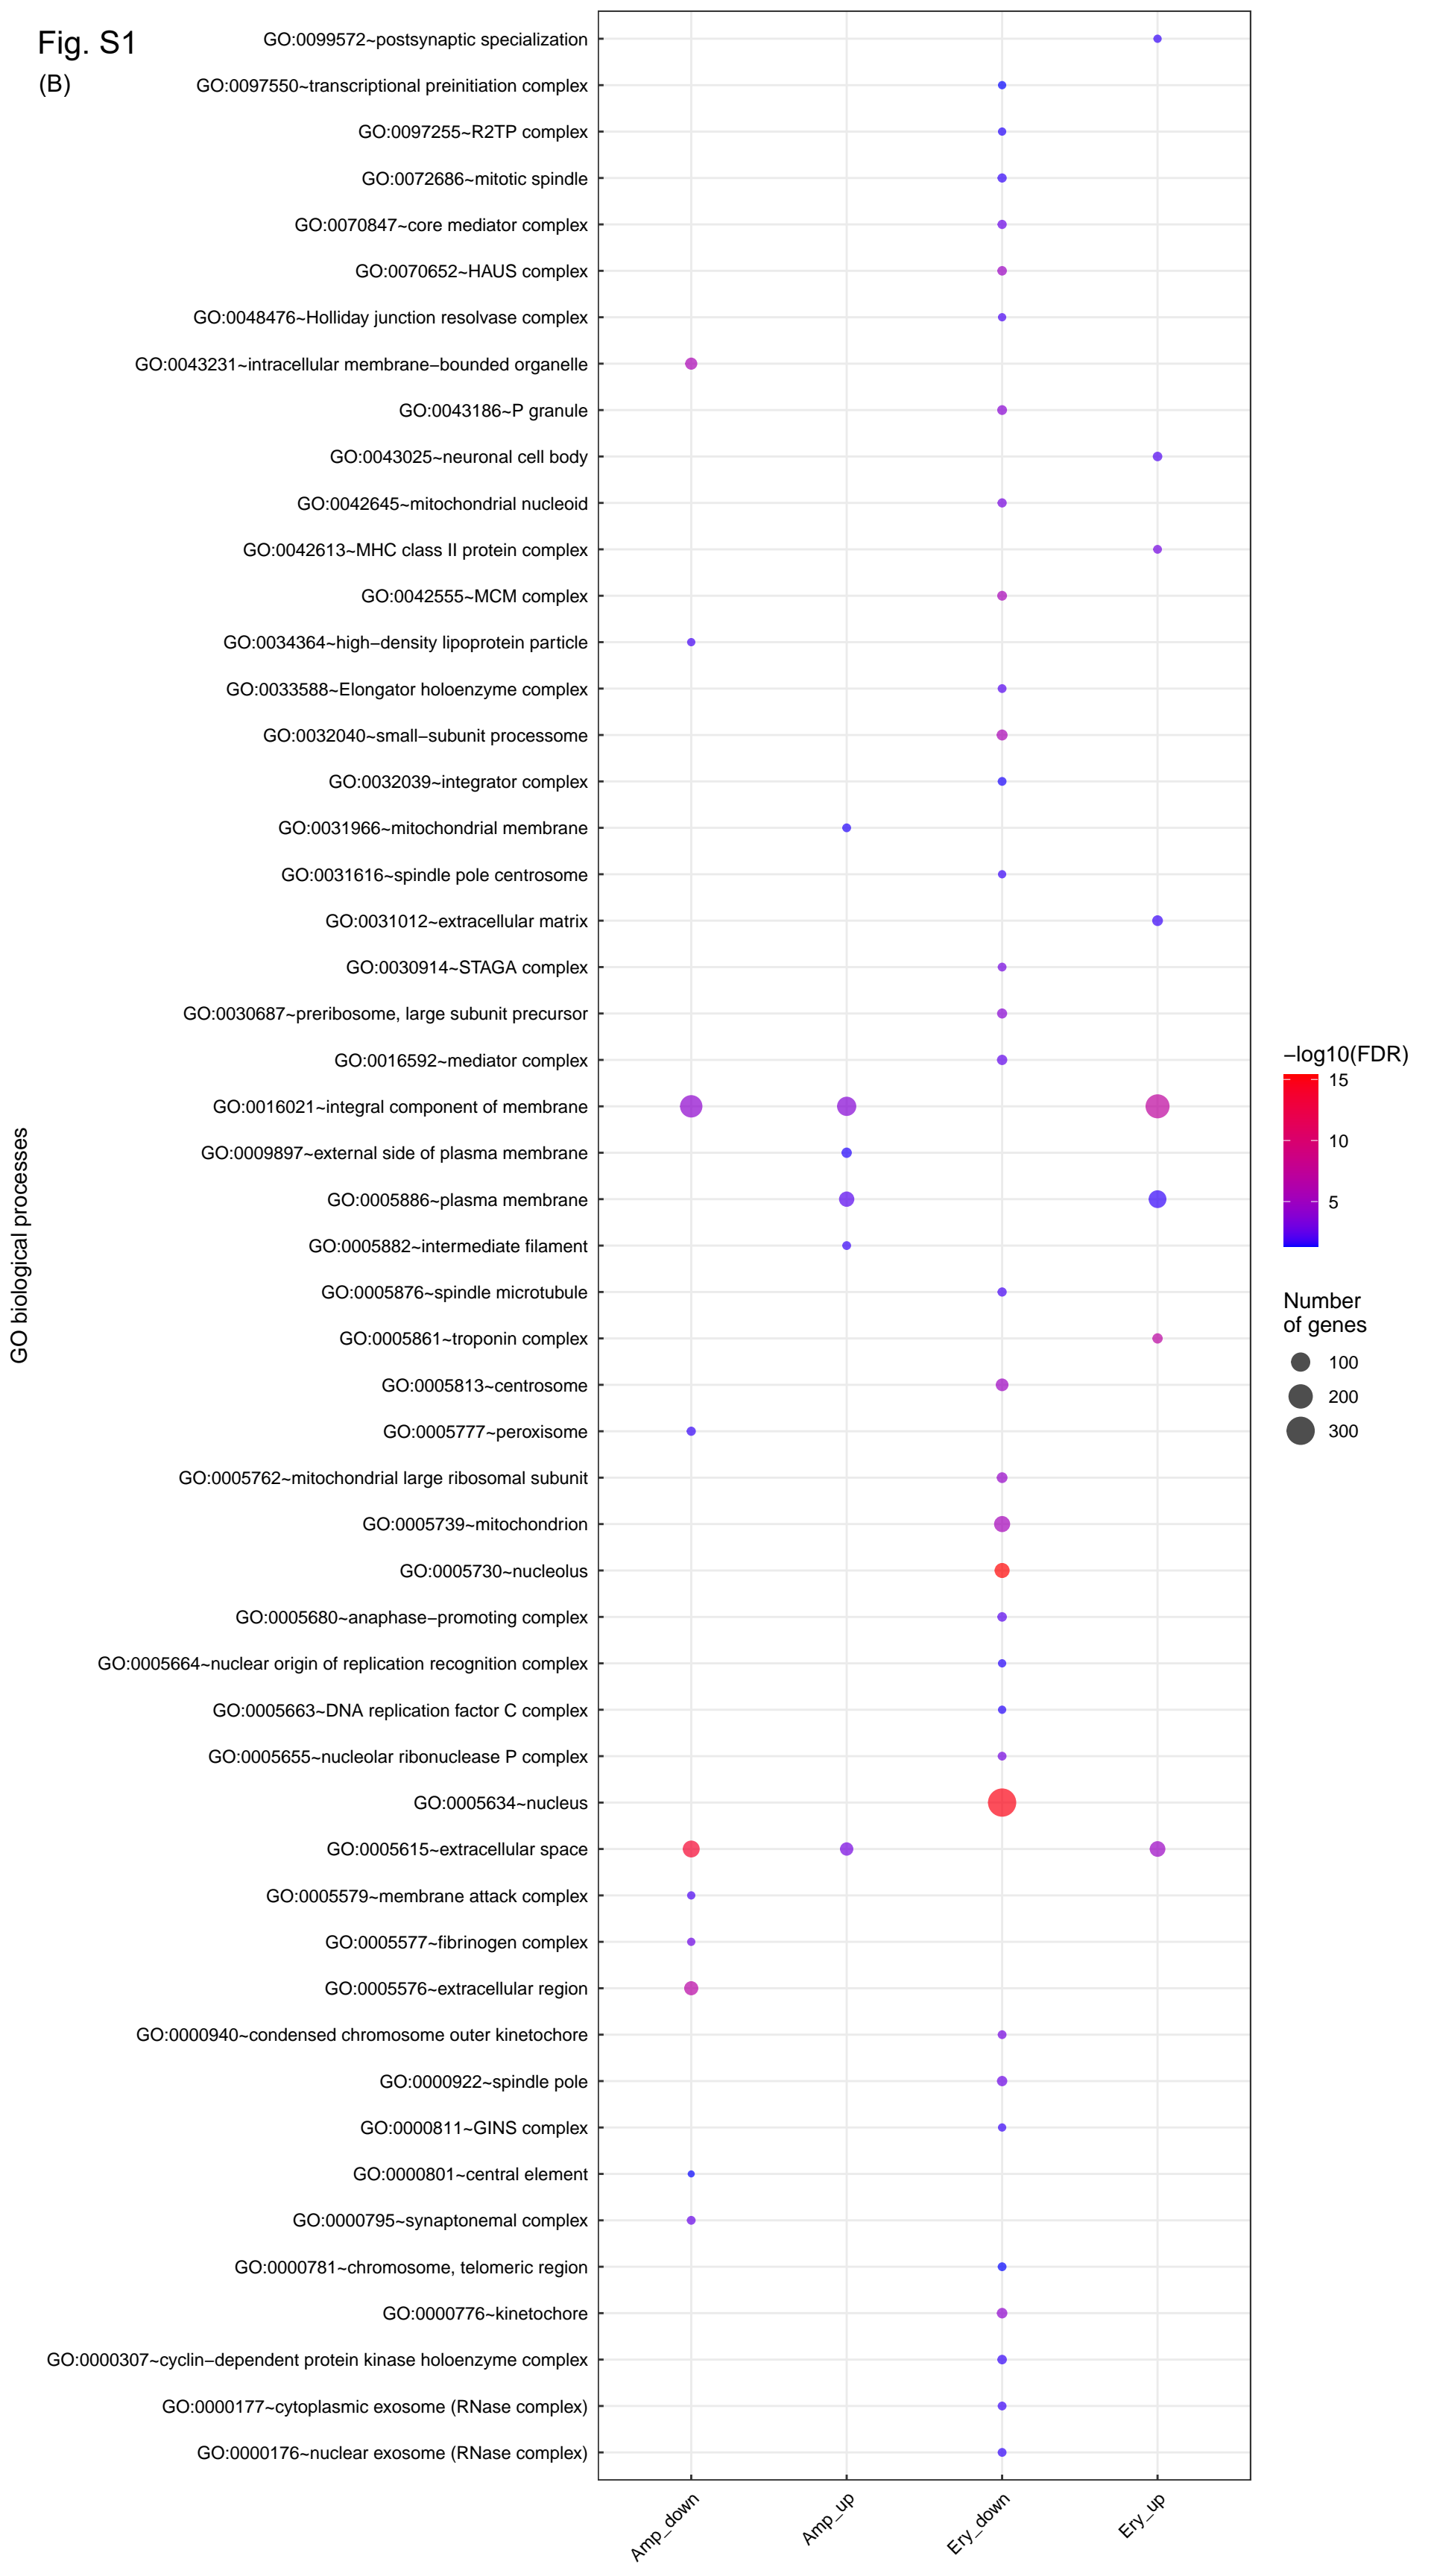

Fig. S1  
(C)

GO biological processes

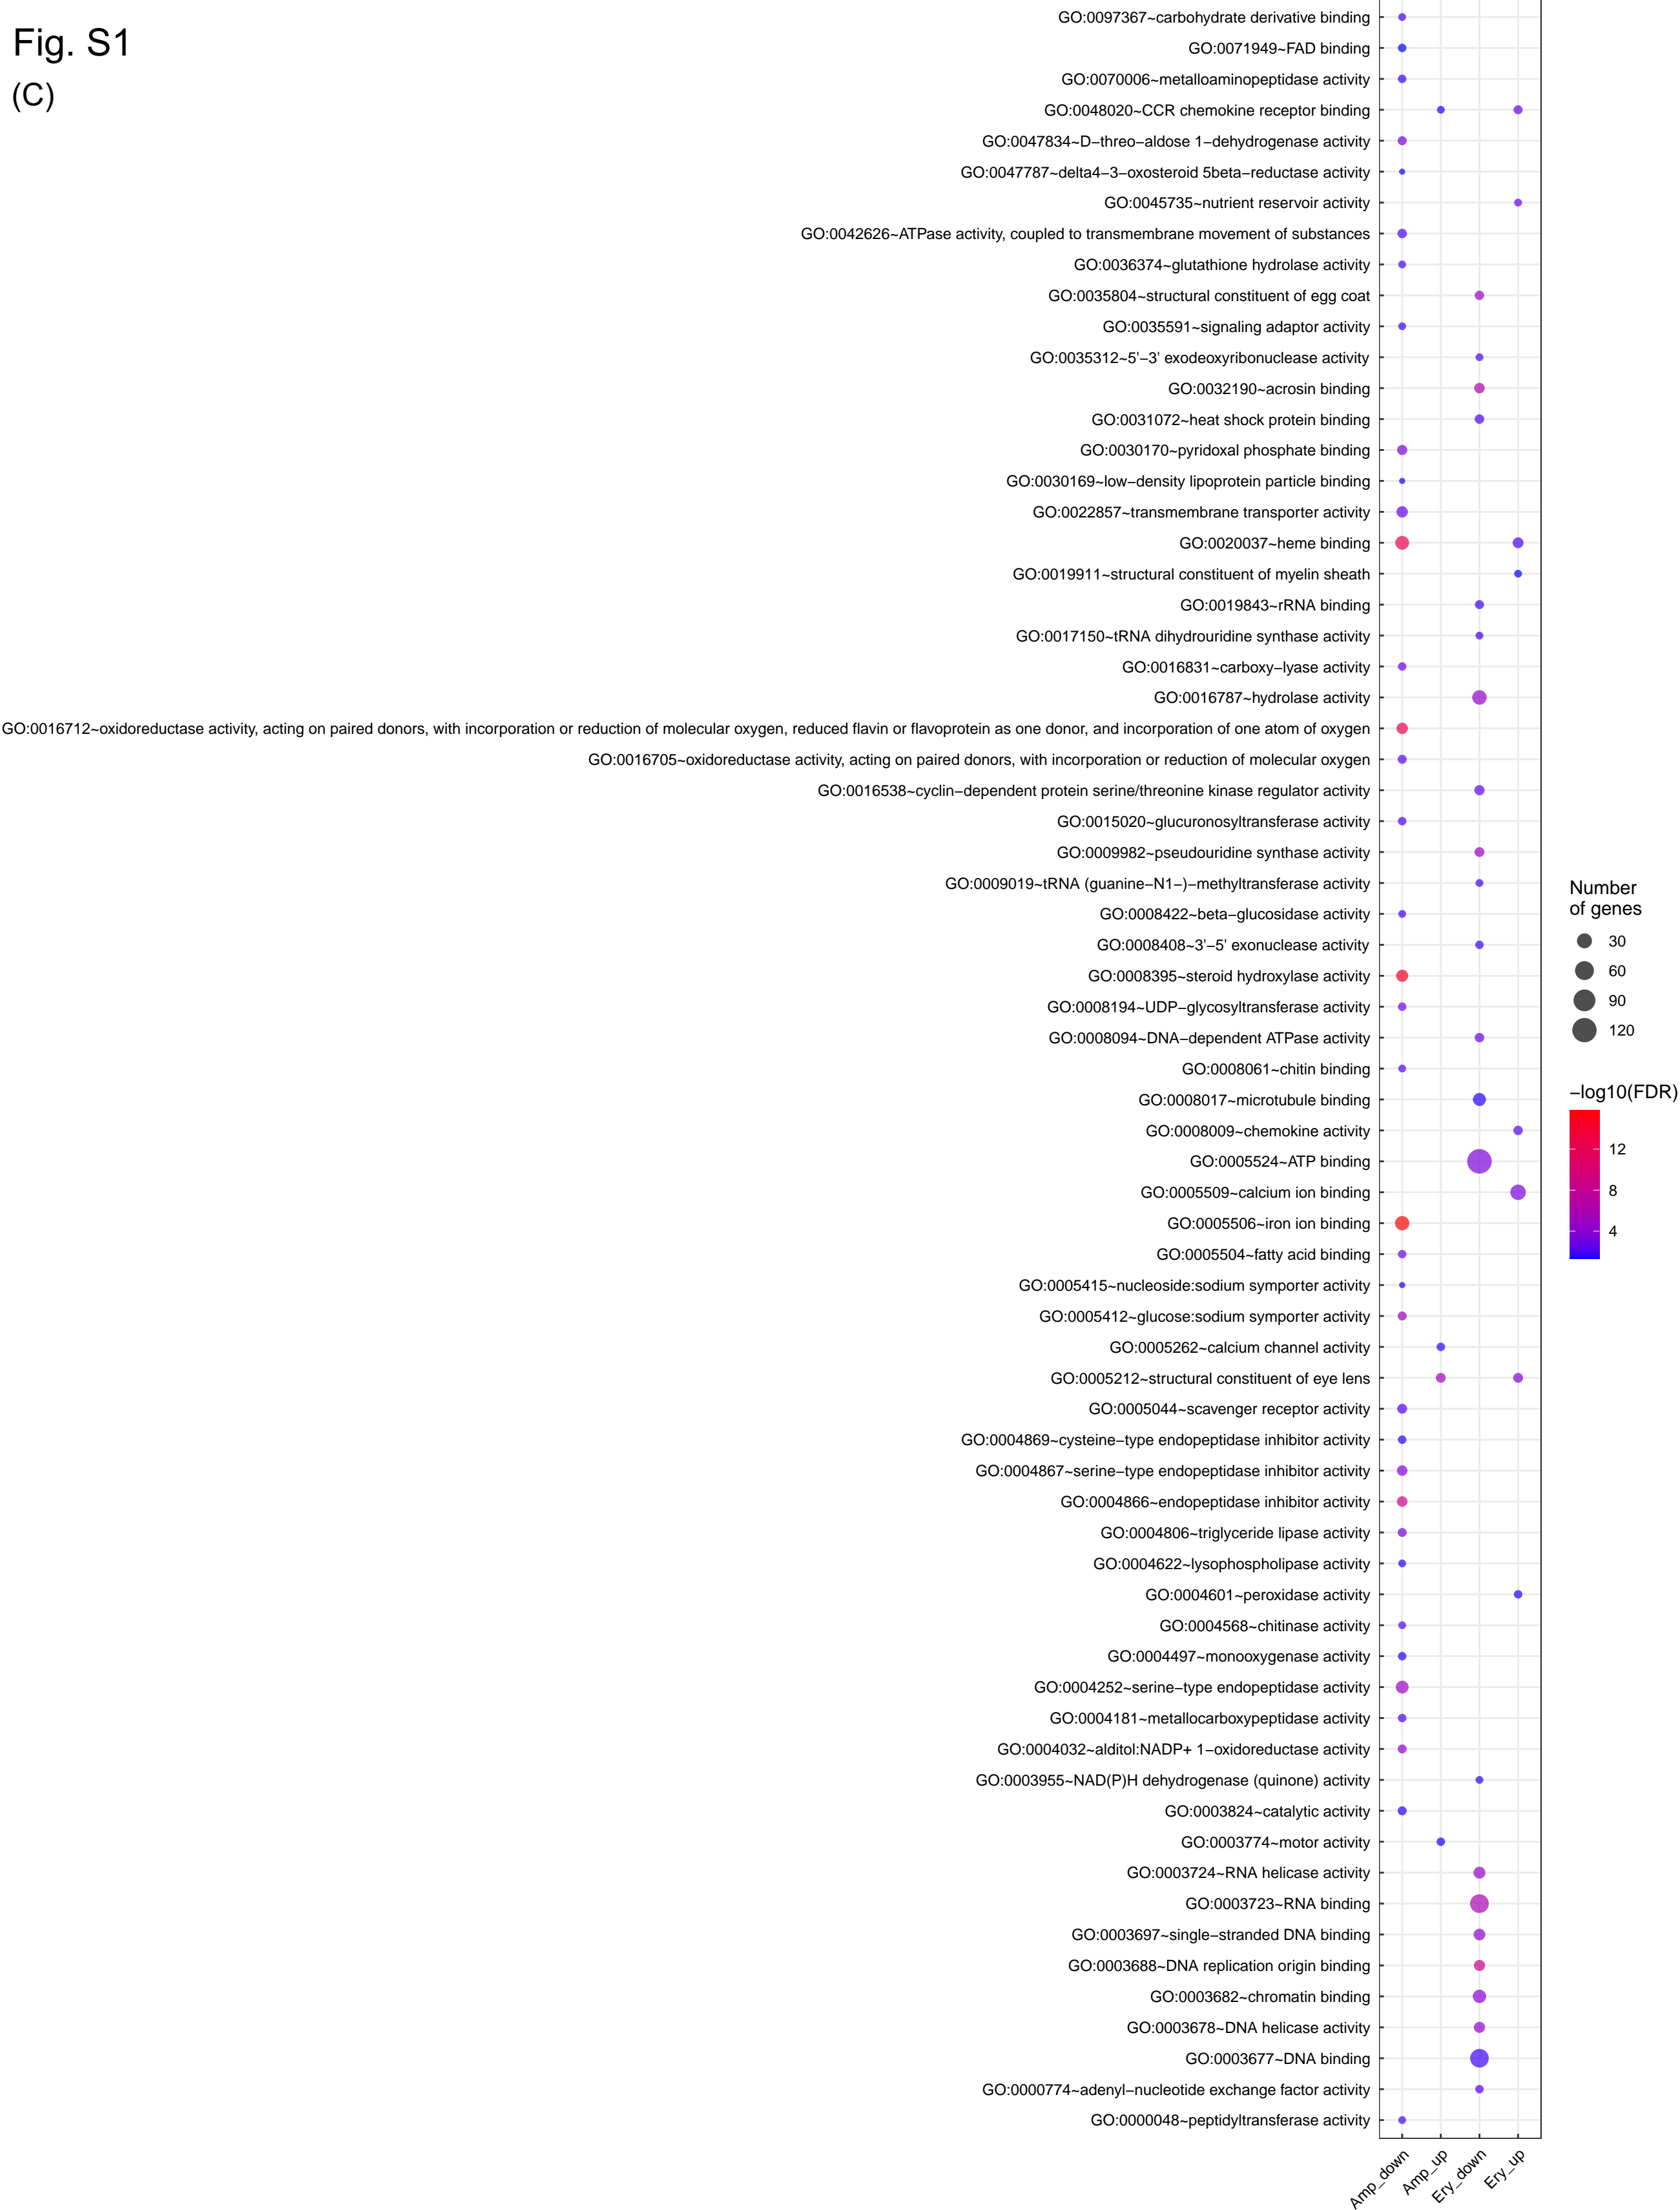

Supplement: Supplementary file 1 [file supplementary]
